# Supplementary material for: Food Insecurity in Central-Eastern Europe: Does Gender Matter?
Source: MDPI journal article supplement (doi:10.3390/su14095435), 2022-04-30
Supplement: s1 [file s1]

**Table S1.** The ordered logit model results

| Variable                                          | Estimate  | St. Error | z-Statistics | 95% confidence interval |        |
|---------------------------------------------------|-----------|-----------|--------------|-------------------------|--------|
| Women                                             | 0.136     | 0.055     | 2.500        | 0.029                   | 0.243  |
| Log HHsize                                        | -0.674    | 0.072     | -9.370       | -0.814                  | -0.533 |
| At least 3 children                               | 0.665     | 0.133     | 4.989        | 0.404                   | 0.926  |
| Social capital                                    | -0.645    | 0.079     | -8.166       | -0.800                  | -0.490 |
| Social network                                    | -0.205    | 0.060     | -3.434       | -0.321                  | -0.088 |
| Education (ref. elementary)                       |           |           |              |                         |        |
| Tertiary                                          | -0.872    | 0.095     | -9.211       | -1.057                  | -0.686 |
| Secondary                                         | -0.420    | 0.072     | -5.871       | -0.560                  | -0.280 |
| Age (ref. at least 70)                            |           |           |              |                         |        |
| Below 34                                          | 0.320     | 0.107     | 2.989        | 0.110                   | 0.529  |
| Age 34-54                                         | 0.447     | 0.107     | 4.189        | 0.238                   | 0.657  |
| Age 55-69                                         | 0.329     | 0.085     | 3.855        | 0.162                   | 0.497  |
| Marital status (ref. single (never been married)) |           |           |              |                         |        |
| Married                                           | 0.001     | 0.0005    | 1.977        | 0.00001                 | 0.002  |
| Widowed                                           | 0.443     | 0.092     | 4.823        | 0.263                   | 0.623  |
| Divorced or separated                             | 0.597     | 0.086     | 6.932        | 0.428                   | 0.766  |
| Domestic partner                                  | 0.324     | 0.088     | 3.689        | 0.152                   | 0.497  |
| Employment status (ref. unemployed)               |           |           |              |                         |        |
| Employed full time for an employer                | -0.553    | 0.161     | -3.429       | -0.869                  | -0.237 |
| Full time self-employed                           | -0.527    | 0.263     | -2.005       | -1.042                  | -0.012 |
| Out of workforce                                  | -0.619    | 0.160     | -3.857       | -0.933                  | -0.304 |
| Part-time employee (want)                         | 0.052     | 0.200     | 0.259        | -0.341                  | 0.444  |
| Part-time employee (don't want)                   | -0.556    | 0.211     | -2.633       | -0.969                  | -0.142 |
| Income quintile group (ref. first quintile group) |           |           |              |                         |        |
| Second quint. group                               | -0.786    | 0.073     | -10.716      | -0.930                  | -0.642 |
| Third quint. group                                | -1.269    | 0.081     | -15.652      | -1.428                  | -1.110 |
| Fourth quint. group                               | -1.537    | 0.089     | -17.204      | -1.712                  | -1.362 |
| Fifth quint. group                                | -2.118    | 0.106     | -20.070      | -2.325                  | -1.912 |
| Cut1                                              | -0.683    | 0.217     | -3.143       | -1.109                  | -0.257 |
| Cut2                                              | 0.868     | 0.216     | 4.020        | 0.445                   | 1.292  |
| Model statistics                                  |           |           |              |                         |        |
| Log Likelihood                                    | -7705.100 |           |              |                         |        |
| McFadden pseudo-R <sup>2</sup>                    | 0.121     |           |              |                         |        |
| AIC                                               | 15474.199 |           |              |                         |        |
| BIC                                               | 15716.138 |           |              |                         |        |

Note: Country fixed effects are included in models.

**Table S2.** The multinomial logit model results

| Variable                                          | Estimate | St. Error | z-Statistics | 95% confidence interval |        |
|---------------------------------------------------|----------|-----------|--------------|-------------------------|--------|
| 1: base outcome                                   |          |           |              |                         |        |
| Results for outcome of 2                          |          |           |              |                         |        |
| Women                                             | 0.126    | 0.062     | 2.050        | 0.006                   | 0.247  |
| Log HHsize                                        | -0.505   | 0.077     | -6.560       | -0.656                  | -0.354 |
| At least 3 children                               | 0.451    | 0.155     | 2.912        | 0.147                   | 0.754  |
| Social capital                                    | -0.331   | 0.090     | -3.684       | -0.507                  | -0.155 |
| Social network                                    | -0.254   | 0.067     | -3.792       | -0.386                  | -0.123 |
| Education (ref. elementary)                       |          |           |              |                         |        |
| Tertiary                                          | -0.660   | 0.108     | -6.112       | -0.872                  | -0.448 |
| Secondary                                         | -0.302   | 0.082     | -3.676       | -0.464                  | -0.141 |
| Age (ref. at least 70)                            |          |           |              |                         |        |
| Below 34                                          | 0.200    | 0.118     | 1.695        | -0.031                  | 0.431  |
| Age 34-54                                         | 0.240    | 0.115     | 2.087        | 0.015                   | 0.466  |
| Age 55-69                                         | 0.277    | 0.095     | 2.915        | 0.091                   | 0.463  |
| Marital status (ref. single (never been married)) |          |           |              |                         |        |
| Married                                           | 0.001    | 0.001     | 1.974        | 0.00001                 | 0.002  |
| Widowed                                           | 0.473    | 0.101     | 4.693        | 0.276                   | 0.671  |
| Divorced or separated                             | 0.453    | 0.093     | 4.896        | 0.272                   | 0.634  |
| Domestic partner                                  | 0.288    | 0.099     | 2.908        | 0.094                   | 0.482  |
| Employment status (ref. unemployed)               |          |           |              |                         |        |
| Employed full time for an employer                | -0.498   | 0.151     | -3.300       | -0.793                  | -0.202 |
| Full time self-employed                           | -0.762   | 0.226     | -3.367       | -1.206                  | -0.319 |
| Out of workforce                                  | -0.614   | 0.153     | -4.014       | -0.914                  | -0.314 |
| Part-time employee (want)                         | 0.067    | 0.216     | 0.313        | -0.355                  | 0.490  |
| Part-time employee (don't want)                   | -0.796   | 0.201     | -3.968       | -1.189                  | -0.403 |
| Income quintile group (ref. first quintile group) |          |           |              |                         |        |
| Second quint. group                               | -0.548   | 0.083     | -6.583       | -0.711                  | -0.385 |
| Third quint. group                                | -0.999   | 0.091     | -10.962      | -1.177                  | -0.820 |
| Fourth quint. group                               | -1.299   | 0.101     | -12.803      | -1.498                  | -1.100 |
| Fifth quint. group                                | -1.766   | 0.118     | -14.972      | -1.997                  | -1.535 |
| Constant                                          | -0.018   | 0.227     | -0.080       | -0.463                  | 0.427  |
| Results for outcome of 3                          |          |           |              |                         |        |
| Women                                             | 0.170    | 0.094     | 1.818        | -0.013                  | 0.354  |
| Log HHsize                                        | -1.009   | 0.122     | -8.293       | -1.248                  | -0.771 |
| At least 3 children                               | 0.964    | 0.198     | 4.874        | 0.576                   | 1.352  |
| Social capital                                    | -1.056   | 0.115     | -9.197       | -1.281                  | -0.831 |
| Social network                                    | -0.117   | 0.100     | -1.172       | -0.312                  | 0.078  |
| Education (ref. elementary)                       |          |           |              |                         |        |
| Tertiary                                          | -1.371   | 0.168     | -8.175       | -1.700                  | -1.043 |
| Secondary                                         | -0.582   | 0.111     | -5.233       | -0.799                  | -0.364 |
| Age (ref. at least 70)                            |          |           |              |                         |        |
| Below 34                                          | 0.537    | 0.184     | 2.920        | 0.176                   | 0.897  |
| Age 34-54                                         | 0.789    | 0.178     | 4.441        | 0.441                   | 1.137  |
| Age 55-69                                         | 0.406    | 0.144     | 2.821        | 0.124                   | 0.688  |
| Marital status (ref. single (never been married)) |          |           |              |                         |        |
| Married                                           | 0.0005   | 0.001     | 0.852        | -0.001                  | 0.002  |
| Widowed                                           | 0.458    | 0.159     | 2.875        | 0.146                   | 0.771  |

|                                                   |           |       |         |        |        |
|---------------------------------------------------|-----------|-------|---------|--------|--------|
| Divorced or separated                             | 0.839     | 0.142 | 5.930   | 0.562  | 1.117  |
| Domestic partner                                  | 0.435     | 0.148 | 2.935   | 0.145  | 0.726  |
| Employment status (ref. unemployed)               |           |       |         |        |        |
| Employed full time for an employer                | -0.725    | 0.218 | -3.322  | -1.153 | -0.297 |
| Full time self-employed                           | -0.285    | 0.309 | -0.923  | -0.891 | 0.321  |
| Out of workforce                                  | -0.711    | 0.219 | -3.241  | -1.141 | -0.281 |
| Part-time employee (want)                         | 0.008     | 0.289 | 0.029   | -0.558 | 0.574  |
| Part-time employee (don't want)                   | -0.292    | 0.272 | -1.073  | -0.824 | 0.241  |
| Income quintile group (ref. first quintile group) |           |       |         |        |        |
| Second quint. group                               | -1.160    | 0.120 | -9.636  | -1.396 | -0.924 |
| Third quint. group                                | -1.786    | 0.142 | -12.534 | -2.065 | -1.506 |
| Fourth quint. group                               | -1.966    | 0.151 | -12.988 | -2.263 | -1.669 |
| Fifth quint. group                                | -2.876    | 0.203 | -14.135 | -3.275 | -2.477 |
| Constant                                          | -0.272    | 0.335 | -0.812  | -0.929 | 0.385  |
| Model statistics                                  |           |       |         |        |        |
| Log Likelihood                                    | -7638.770 |       |         |        |        |
| McFadden pseudo-R <sup>2</sup>                    | 0.129     |       |         |        |        |
| AIC                                               | 15401.541 |       |         |        |        |
| BIC                                               | 15870.297 |       |         |        |        |

Note: Country fixed effects are included in models.

**Table S3.** The generalized ordered logit model results

| Variable                                          | Estimate | St. Error | z-Statistics | 95% confidence interval |        |
|---------------------------------------------------|----------|-----------|--------------|-------------------------|--------|
| Results for outcome of 1                          |          |           |              |                         |        |
| Women                                             | 0.135    | 0.055     | 2.459        | 0.027                   | 0.243  |
| Log HHsize                                        | -0.640   | 0.072     | -8.946       | -0.780                  | -0.500 |
| At least 3 children                               | 0.622    | 0.132     | 4.702        | 0.363                   | 0.881  |
| Social capital                                    | -0.553   | 0.077     | -7.148       | -0.704                  | -0.401 |
| Social network                                    | -0.216   | 0.060     | -3.599       | -0.334                  | -0.099 |
| Education (ref. elementary)                       |          |           |              |                         |        |
| Tertiary                                          | -0.831   | 0.096     | -8.619       | -1.020                  | -0.642 |
| Secondary                                         | -0.393   | 0.072     | -5.420       | -0.535                  | -0.251 |
| Age (ref. et least 70)                            |          |           |              |                         |        |
| Below 34                                          | 0.293    | 0.107     | 2.728        | 0.082                   | 0.503  |
| Age 34-54                                         | 0.404    | 0.106     | 3.814        | 0.196                   | 0.611  |
| Age 55-69                                         | 0.322    | 0.086     | 3.733        | 0.153                   | 0.492  |
| Marital status (ref. single (never been married)) |          |           |              |                         |        |
| Married                                           | 0.001    | 0.000     | 2.754        | 0.0004                  | 0.002  |
| Widowed                                           | 0.464    | 0.092     | 5.025        | 0.283                   | 0.646  |
| Divorced or separated                             | 0.571    | 0.084     | 6.775        | 0.406                   | 0.737  |
| Domestic partner                                  | 0.313    | 0.088     | 3.558        | 0.141                   | 0.486  |
| Employment status (ref. unemployed)               |          |           |              |                         |        |
| Employed full time for an employer                | -0.610   | 0.139     | -4.377       | -0.884                  | -0.337 |
| Full time self-employed                           | -0.689   | 0.198     | -3.481       | -1.077                  | -0.301 |
| Out of workforce                                  | -0.687   | 0.143     | -4.823       | -0.967                  | -0.408 |
| Part-time employee (want)                         | 0.024    | 0.194     | 0.125        | -0.356                  | 0.404  |
| Part-time employee (don't want)                   | -0.691   | 0.177     | -3.900       | -1.038                  | -0.344 |
| Income quintile group (ref. first quintile group) |          |           |              |                         |        |
| Second quint. group                               | -0.738   | 0.074     | -9.967       | -0.883                  | -0.593 |
| Third quint. group                                | -1.224   | 0.082     | -14.996      | -1.384                  | -1.064 |
| Fourth quint. group                               | -1.496   | 0.090     | -16.639      | -1.673                  | -1.320 |
| Fifth quint. group                                | -2.063   | 0.106     | -19.426      | -2.271                  | -1.855 |
| Constant                                          | 0.641    | 0.209     | 3.074        | 0.232                   | 1.050  |
| Results for outcome of 2                          |          |           |              |                         |        |
| Women                                             | 0.166    | 0.090     | 1.851        | -0.010                  | 0.342  |
| Log HHsize                                        | -0.871   | 0.117     | -7.434       | -1.100                  | -0.641 |
| At least 3 children                               | 0.851    | 0.188     | 4.533        | 0.483                   | 1.219  |
| Social capital                                    | -0.914   | 0.109     | -8.408       | -1.127                  | -0.701 |
| Social network                                    | -0.104   | 0.094     | -1.097       | -0.289                  | 0.082  |
| Education (ref. elementary)                       |          |           |              |                         |        |
| Tertiary                                          | -1.256   | 0.161     | -7.792       | -1.572                  | -0.940 |
| Secondary                                         | -0.495   | 0.105     | -4.691       | -0.701                  | -0.288 |
| Age (ref. at least 70)                            |          |           |              |                         |        |
| Below 34                                          | 0.474    | 0.181     | 2.622        | 0.120                   | 0.828  |
| Age 34-54                                         | 0.706    | 0.175     | 4.038        | 0.363                   | 1.048  |
| Age 55-69                                         | 0.327    | 0.140     | 2.337        | 0.053                   | 0.601  |
| Marital status (ref. single (never been married)) |          |           |              |                         |        |
| Married                                           | 0.0003   | 0.001     | 0.620        | -0.001                  | 0.001  |
| Widowed                                           | 0.335    | 0.153     | 2.195        | 0.036                   | 0.634  |
| Divorced or separated                             | 0.701    | 0.134     | 5.220        | 0.438                   | 0.965  |

|                                                   |           |       |         |        |        |
|---------------------------------------------------|-----------|-------|---------|--------|--------|
| Domestic partner                                  | 0.380     | 0.144 | 2.643   | 0.098  | 0.662  |
| Employment status (ref. unemployed)               |           |       |         |        |        |
| Employed full time for an employer                | -0.541    | 0.215 | -2.512  | -0.964 | -0.119 |
| Full time self-employed                           | -0.110    | 0.310 | -0.355  | -0.717 | 0.497  |
| Out of workforce                                  | -0.542    | 0.218 | -2.486  | -0.970 | -0.115 |
| Part-time employee (want)                         | -0.091    | 0.282 | -0.324  | -0.645 | 0.462  |
| Part-time employee (don't want)                   | -0.099    | 0.262 | -0.376  | -0.613 | 0.416  |
| Income quintile group (ref. first quintile group) |           |       |         |        |        |
| Second quint. group                               | -0.975    | 0.118 | -8.289  | -1.205 | -0.744 |
| Third quint. group                                | -1.490    | 0.138 | -10.803 | -1.760 | -1.219 |
| Fourth quint. group                               | -1.659    | 0.146 | -11.338 | -1.946 | -1.372 |
| Fifth quint. group                                | -2.518    | 0.204 | -12.359 | -2.917 | -2.118 |
| Constant                                          | -0.891    | 0.330 | -2.701  | -1.538 | -0.245 |
| <i>Model statistics</i>                           |           |       |         |        |        |
| Log Likelihood                                    | -7671.200 |       |         |        |        |
| McFadden pseudo-R2                                | 0.129     |       |         |        |        |
| AIC                                               | 15466.391 |       |         |        |        |
| BIC                                               | 15935.147 |       |         |        |        |

Note: Country fixed effects are included in models.
